# Supplementary material for: A thermodynamic framework for bulk–surface partitioning in finite-volume mixed organic–inorganic aerosol particles and cloud droplets
Source: Copernicus journal article supplement (doi:10.5194/acp-23-7741-2023), 2023-07-14
Supplement: Supplementary file 1 [file acp-23-7741-2023-supplement.pdf]

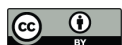

*Supplement of*

## **A thermodynamic framework for bulk–surface partitioning in finite-volume mixed organic–inorganic aerosol particles and cloud droplets**

**Ryan Schmedding and Andreas Zuend**

*Correspondence to:* Andreas Zuend ([andreas.zuend@mcgill.ca](mailto:andreas.zuend@mcgill.ca))

The copyright of individual parts of the supplement might differ from the article licence.

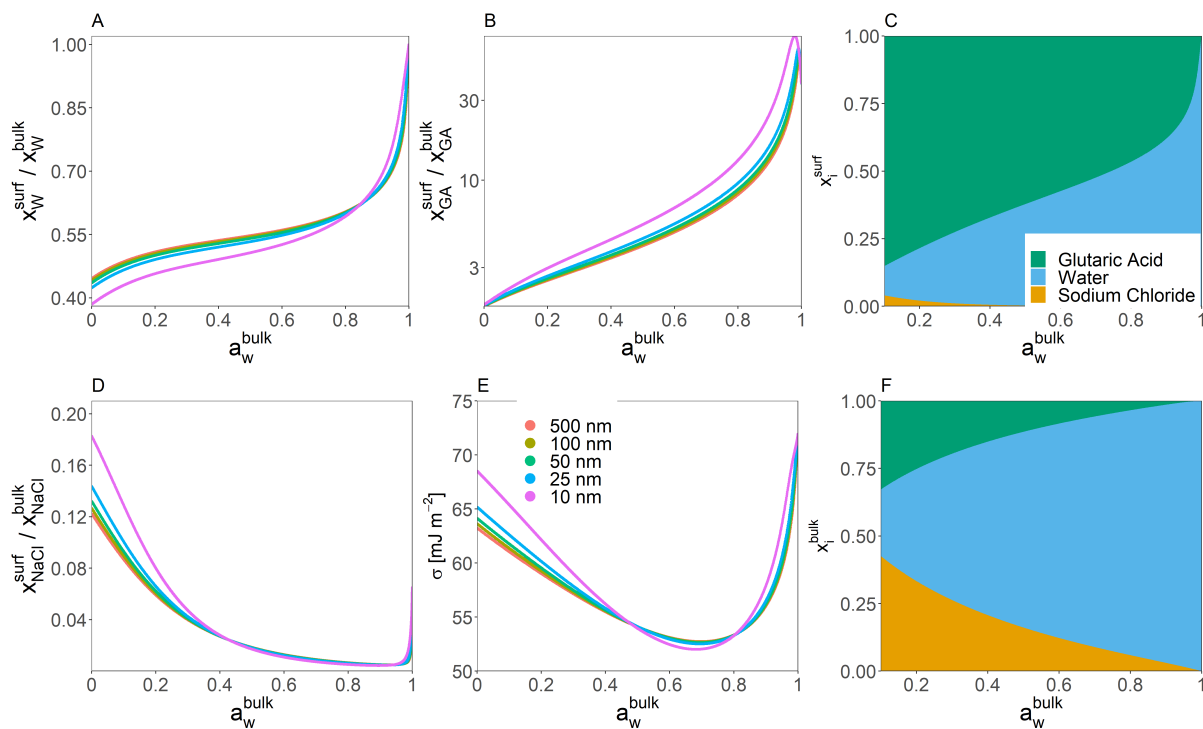

**Figure S1.** Predicted bulk–surface partitioning coefficient ( $\frac{x_i^{\text{surf}}}{x_i^{\text{bulk}}}$ ) of (A) water, (B) glutaric acid, and (D) sodium chloride present in a forced single-bulk-phase particle at  $T = 298$  K as a function of  $a_w^{\text{bulk}}$ . Right column (composition bar graphs): shown are the mole fractions of each species in the surface and the bulk phase ( $\alpha$ ) for the particle of 25 nm dry diameter.

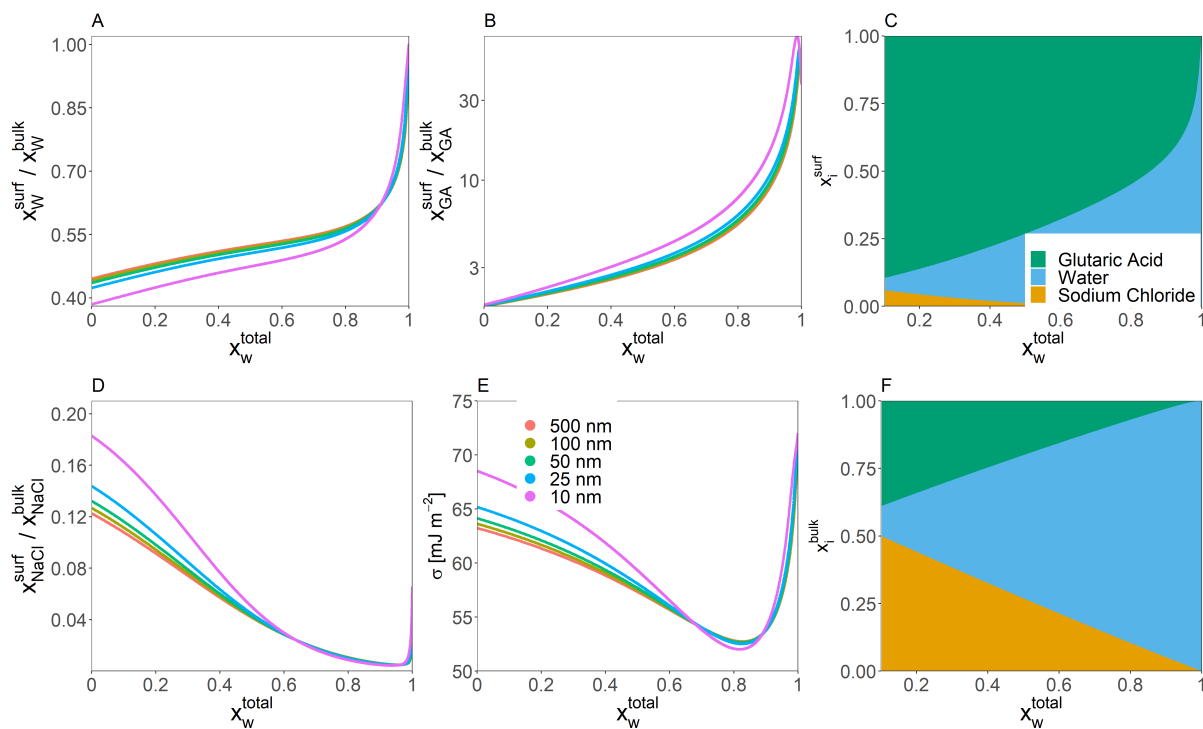

**Figure S2.** Predicted bulk–surface partitioning coefficient ( $\frac{x_i^{\text{surf}}}{x_i^{\text{bulk}}}$ ) of (A) water, (B) glutaric acid, and (D) sodium chloride present in a forced single-bulk-phase particle at  $T = 298$  K as a function of  $x_w^{\text{total}}$ . Right column (composition bar graphs): shown are the mole fractions of each species in the surface and the bulk phase ( $\alpha$ ) for the particle of 25 nm dry diameter.

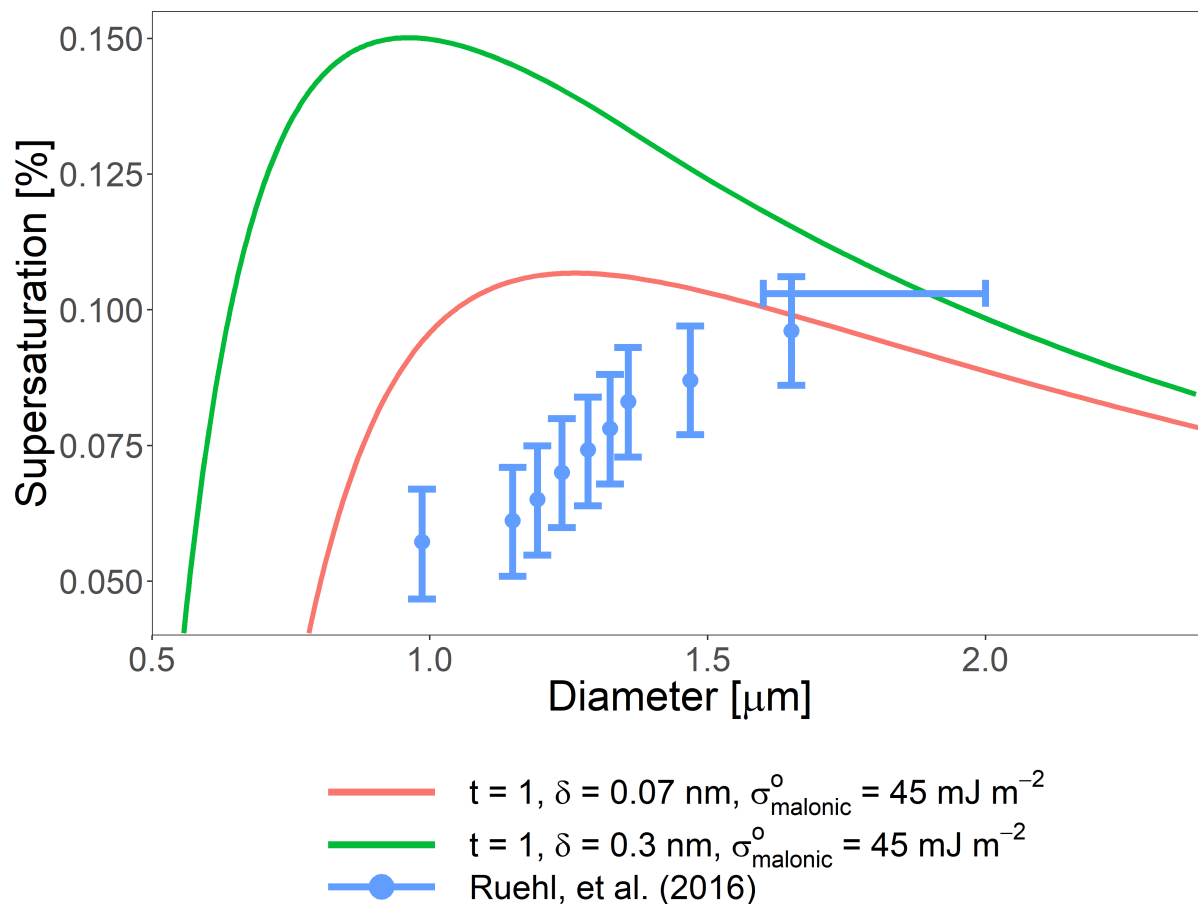

**Figure S3.** Predicted saturation ratio for a ternary water–malonic-acid–ammonium-sulfate system corresponding to a 50 nm diameter ammonium sulfate core coated to a total diameter of 150 nm with malonic acid, corresponding to measurements by Ruehl et al. (2016). In order to better match the experimental data better,  $\delta$  was set to 0.07 nm. No combination of  $t$  and modifications to  $\sigma_{\text{malonic}}^{\circ}$  were able to capture both the points leading up to the critical supersaturation and the critical supersaturation itself. Also shown is a prediction using the more standard assumptions that  $t = 1$ ,  $\delta = 0.3 \text{ nm}$ , and  $\sigma_{\text{malonic}}^{\circ} = 45.0 \text{ mJ m}^{-2}$  (Hyvärinen et al., 2006) The horizontal bar represents the critical supersaturation for cloud activation (Ruehl et al., 2016).

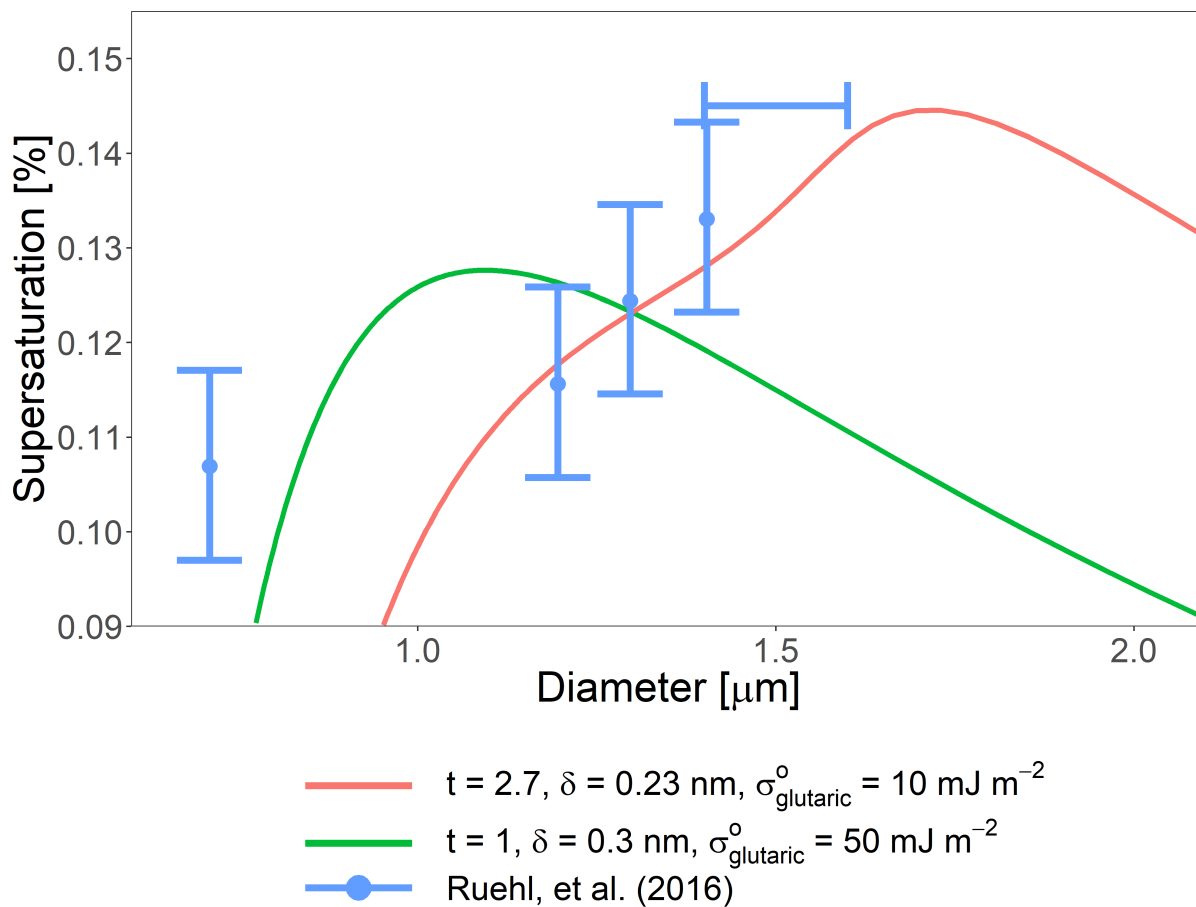

**Figure S4.** Predicted saturation ratio for a ternary water–glutaric-acid–ammonium-sulfate system corresponding to a 50 nm diameter ammonium sulfate core coated to a total diameter of 150 nm with glutaric acid, corresponding to measurements by Ruehl et al. (2016). In order to better match the experimental data better,  $\delta$  was set to 0.23 nm.  $t$  was set to 2.7 and  $\sigma_{\text{glutaric}}^{\circ}$  was set to  $10 \text{ mJ m}^{-2}$ . Also shown is a prediction using the more standard assumptions that  $t = 1$ ,  $\delta = 0.3 \text{ nm}$ , and  $\sigma_{\text{glutaric}}^{\circ} = 50 \text{ mJ m}^{-2}$  (Ruehl et al., 2016; Hyvärinen et al., 2006; Booth et al., 2009) The horizontal bar represents the critical supersaturation for cloud activation Ruehl et al. (2016).

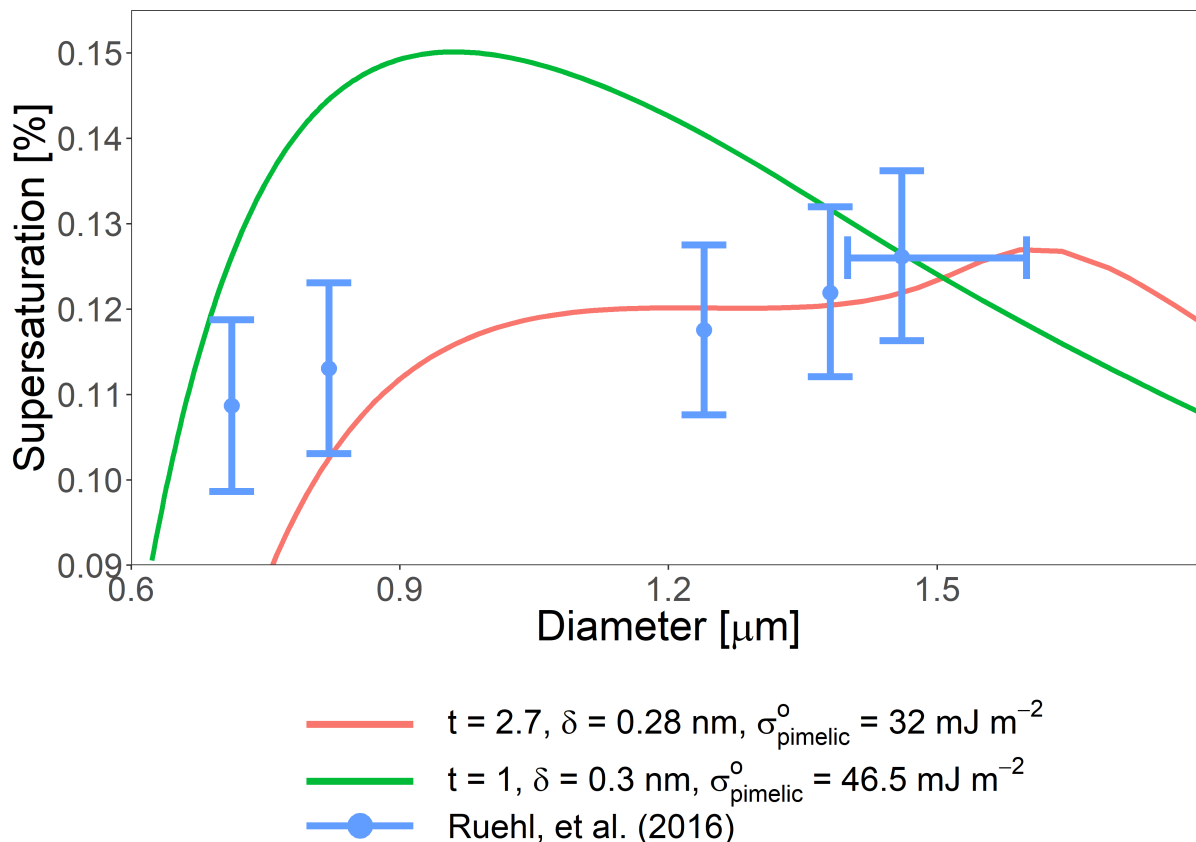

**Figure S5.** Predicted saturation ratio for a ternary water–pimelic-acid–ammonium-sulfate system corresponding to a 50 nm diameter ammonium sulfate core coated to a total diameter of 150 nm with succinic acid, corresponding to measurements by Ruehl et al. (2016). In order to better match the experimental data better,  $\delta$  was set to 0.28 nm,  $t$  was set to 2.7 and  $\sigma_{\text{pimelic}}$  was set to  $32 \text{ mJ m}^{-2}$ . Also shown is a prediction using the more standard assumptions that  $t = 1$ ,  $\delta = 0.3 \text{ nm}$ , and  $\sigma_{\text{pimelic}} = 46.5 \text{ mJ m}^{-2}$  based on similarity to other surface tensions of similar dicarboxylic acids reported by Hyvärinen et al. (2006). The horizontal bar represents the critical supersaturation for cloud activation Ruehl et al. (2016).

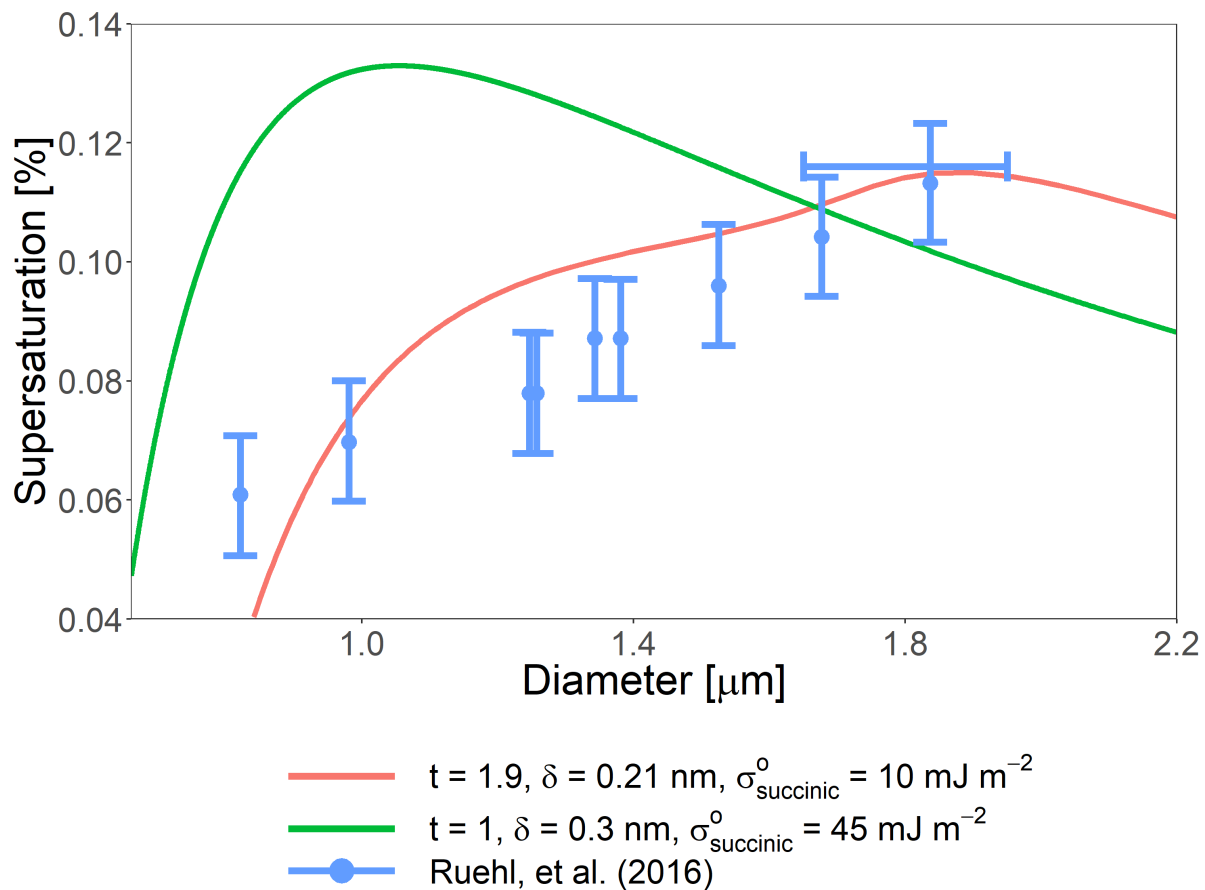

**Figure S6.** Predicted saturation ratio for a ternary water–succinic-acid–ammonium-sulfate system corresponding to a 50 nm diameter ammonium sulfate core coated to a total diameter of 150 nm with succinic acid, corresponding to measurements by Ruehl et al. (2016). In order to better match the experimental data better,  $\sigma_{\text{succinic}}^{\circ}$  was set to  $10 \text{ mJ m}^{-2}$ ,  $\delta$  was set to 0.21 nm, the value of  $t$  was set to 1.9. Also shown is a prediction using the more standard assumptions that  $t = 1$ ,  $\delta = 0.3 \text{ nm}$ , and  $\sigma_{\text{succinic}}^{\circ} = 45.0 \text{ mJ m}^{-2}$  (Hyvärinen et al., 2006). The horizontal bar represents the critical supersaturation for cloud activation Ruehl et al. (2016).

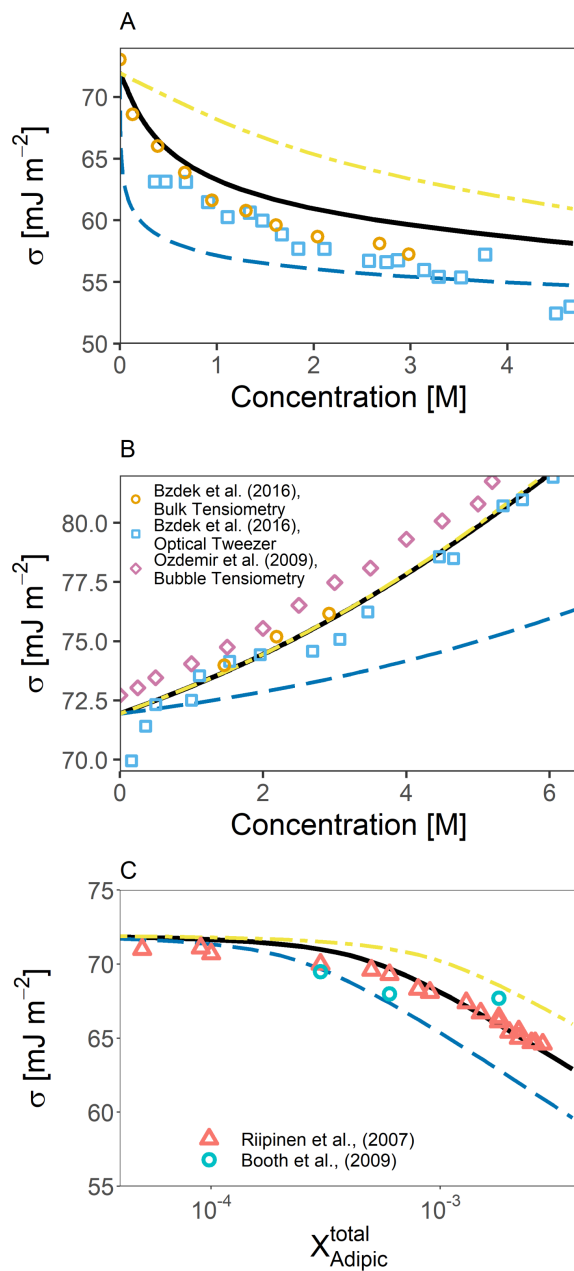

**Figure S7.** Predicted solution surface tensions assuming a 10% reduction or increase in  $\sigma_{solute}^o$  (blue and yellow curves respectively) for the systems shown in (A) Figure 1A, (B) Figure 1B, and (C) Figure 3. All systems had a starting particle size of 5  $\mu\text{m}$  and  $\delta = 0.3$  nm



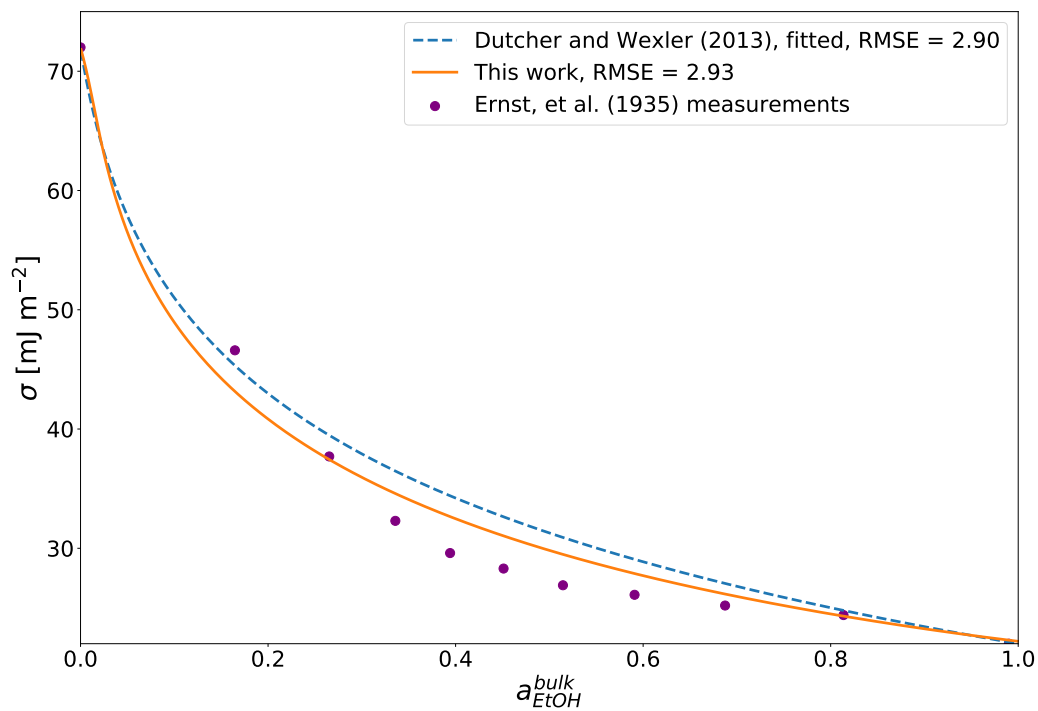

**Figure S8.** Surface tension of a binary water-ethanol droplet with a dry diameter of 50  $\mu\text{m}$  as predicted by Eq (24) and the simplified statistical mechanics model from Wexler and Dutcher (2013). Measurements of the solution surface tension as a function of the AIOMFAC-predicted bulk ethanol activity are also shown from Ernst et al. (1935).

**Table S1.** Surrogate component concentrations for isoprene-derived SOA based on a simulation by the Master Chemical Mechanism (Jenkin et al., 1997, 2012, 2015). The listed concentrations are total amounts (gas plus particle phase) per unit volume of air for the co-condensation scenario, as well as condensed phase concentrations only for the calculations without co-condensation of organic species. For more details, see the supplementary material of Rastak et al. (2017) and Gervasi et al. (2020).

| Name<br>(MCM) | M [g mol <sup>-1</sup> ] | Input Concentration [mol m <sup>-3</sup> ] |                             |
|---------------|--------------------------|--------------------------------------------|-----------------------------|
|               |                          | Co-condensation<br>Enabled                 | Co-condensation<br>Disabled |
| IEB1OOH       | 150.11                   | $3.76459 \times 10^{-8}$                   | $2.38011 \times 10^{-8}$    |
| IEB2OOH       | 150.11                   | $6.75043 \times 10^{-9}$                   | $1.83810 \times 10^{-9}$    |
| C59OOH        | 150.09                   | $3.92509 \times 10^{-8}$                   | $3.11576 \times 10^{-8}$    |
| IEC1OOH       | 150.09                   | $1.37006 \times 10^{-8}$                   | $1.08756 \times 10^{-8}$    |
| C58OOH        | 150.11                   | $3.91125 \times 10^{-9}$                   | $2.47284 \times 10^{-9}$    |
| IEPOXA        | 118.13                   | $2.56541 \times 10^{-15}$                  | $8.11516 \times 10^{-19}$   |
| C57OOH        | 150.11                   | $3.17789 \times 10^{-9}$                   | $2.00918 \times 10^{-9}$    |
| IEPOXC        | 118.13                   | $1.99219 \times 10^{-14}$                  | $2.61410 \times 10^{-17}$   |
| HIEB1OOH      | 166.11                   | $1.92764 \times 10^{-9}$                   | $1.92561 \times 10^{-9}$    |
| INDOOH        | 197.14                   | $1.41401 \times 10^{-9}$                   | $1.40886 \times 10^{-9}$    |
| IEACO3H       | 148.10                   | $1.08728 \times 10^{-13}$                  | $4.00883 \times 10^{-16}$   |
| C525OOH       | 166.09                   | $1.44713 \times 10^{-9}$                   | $1.44655 \times 10^{-9}$    |
| HIEB2OOH      | 166.11                   | $9.55507 \times 10^{-10}$                  | $9.48692 \times 10^{-10}$   |
| IEC2OOH       | 148.06                   | $7.53565 \times 10^{-13}$                  | $1.56989 \times 10^{-14}$   |
| INAOOH        | 197.14                   | $7.93083 \times 10^{-10}$                  | $7.82336 \times 10^{-10}$   |
| C510OOH       | 195.10                   | $7.27167 \times 10^{-11}$                  | $2.37637 \times 10^{-11}$   |
| INB1OOH       | 197.14                   | $4.04138 \times 10^{-10}$                  | $4.02731 \times 10^{-10}$   |
| IECCO3H       | 148.11                   | $4.87375 \times 10^{-13}$                  | $5.69206 \times 10^{-15}$   |
| INCOOH        | 197.14                   | $1.82889 \times 10^{-10}$                  | $1.72834 \times 10^{-10}$   |
| INB2OOH       | 197.14                   | $1.98863 \times 10^{-10}$                  | $1.96461 \times 10^{-10}$   |
| Tetrol Dimer  | 254.28                   | $3.15073 \times 10^{-8}$                   | $3.15073 \times 10^{-8}$    |

**Table S2.** List of abbreviations used in this work and their meanings.

| <b>Abbreviation</b> | <b>Meaning</b>                                                             |
|---------------------|----------------------------------------------------------------------------|
| VOC                 | Volatile Organic Compound                                                  |
| SVOC                | Semi-Volatile Organic Compound                                             |
| IVOC                | Intermediate Volatility Organic Compound                                   |
| LVOC                | Low Volatility Organic Compound                                            |
| POA                 | Primary Organic Aerosol                                                    |
| SOA                 | Secondary Organic Aerosol                                                  |
| LLPS                | Liquid-Liquid Phase Separation                                             |
| CCN                 | Cloud Condensation Nucleus                                                 |
| RH                  | Relative Humidity                                                          |
| LLE                 | Liquid-Liquid Equilibrium                                                  |
| AIOMFAC             | Aerosol Inorganic-Organic Mixtures Functional groups Activity Coefficients |
| PM                  | Particulate matter                                                         |

Table S3: List of mathematical symbols used in this work and their meanings.

| Category                  | Symbol           | Meaning                                                                                                  | Units                             |   |
|---------------------------|------------------|----------------------------------------------------------------------------------------------------------|-----------------------------------|---|
| Mathematical<br>Variables | $A$              | area of the surface                                                                                      | $\text{m}^2$                      |   |
|                           | $\mathcal{A}_i$  | partial molar area of $i$                                                                                | $\text{m}^2 \text{mol}^{-1}$      |   |
|                           | $a_i$            | chemical activity (mole-fraction- or molality-based) of $i$                                              | –                                 |   |
|                           | $A^{SL}$         | Szyszkowski–Langmuir fit parameter                                                                       | $\text{J m}^{-2}$                 |   |
|                           | $B^{SL}$         | Szyszkowski–Langmuir fit parameters                                                                      | $\text{mol m}^{-3}$               |   |
|                           | $C^{SL}$         | bulk concentration in Szyszkowski–Langmuir model                                                         | concentration                     |   |
|                           | $A_{\circ}^{CF}$ | maximum surface adsorption in the compressed film model                                                  | $\text{mol m}^{-2}$               |   |
|                           | $A^{CF}$         | current surface adsorption in compressed film model                                                      | $\text{mol m}^{-2}$               |   |
|                           | $D$              | diameter                                                                                                 | $\text{m}$                        |   |
|                           | $G$              | Gibbs energy                                                                                             | $\text{J}$                        |   |
|                           | $f_i$            | volume fraction of $i$                                                                                   | –                                 |   |
|                           | $M_i$            | molar mass of $i$                                                                                        | $\text{kg mol}^{-1}$              |   |
|                           | $n_i$            | number of moles                                                                                          | $\text{mol}$                      |   |
|                           | $P$              | pressure                                                                                                 | $\text{Pa}$                       |   |
|                           | $R$              | universal gas constant                                                                                   | $\text{J mol}^{-1} \text{K}^{-1}$ |   |
|                           | $S$              | entropy or saturation ratio (depending on context)                                                       | $\text{J K}^{-1}$                 |   |
|                           |                  |                                                                                                          | or –                              |   |
|                           |                  | $SS$                                                                                                     | supersaturation                   | % |
|                           | $T$              | temperature                                                                                              | $\text{K}$                        |   |
|                           | $t$              | exponential scaling factor for surface activity coefficients                                             | –                                 |   |
|                           | $U$              | internal energy                                                                                          | $\text{J}$                        |   |
|                           | $V$              | system volume                                                                                            | $\text{m}^3$                      |   |
|                           | $\mathcal{V}_i$  | molar volume of $i$                                                                                      | $\text{m}^3 \text{mol}^{-1}$      |   |
|                           | $x_i$            | mole fraction of $i$                                                                                     | –                                 |   |
| Greek Letter<br>Variables | $\Gamma$         | Gibbs surface excess                                                                                     | $\text{mol m}^{-2}$               |   |
|                           | $\gamma_i$       | activity coefficient of $i$                                                                              | –                                 |   |
|                           | $\delta$         | thickness of Guggenheim surface phase                                                                    | $\text{m}$                        |   |
|                           | $\epsilon$       | machine precision                                                                                        | –                                 |   |
|                           | $\varepsilon_i$  | fraction of the total particle amount of species $i$ partitioned to the surface phase (surface fraction) | –                                 |   |
|                           | $\zeta_i$        | fraction of $i$ in between the maximum and minimum possible volumes it can occupy in the surface         | –                                 |   |

|              |            |                                                                                      |                     |
|--------------|------------|--------------------------------------------------------------------------------------|---------------------|
|              | $\kappa$   | hygroscopicity parameter                                                             | —                   |
|              | $\mu_i$    | chemical potential of $i$                                                            | $\text{J mol}^{-1}$ |
|              | $\xi_i$    | intrinsic chemical potential of the surface phase of $i$                             | $\text{J mol}^{-2}$ |
|              | $\rho_i$   | density of $i$                                                                       | $\text{kg m}^{-3}$  |
|              | $\sigma_i$ | surface tension of $i$                                                               | $\text{J m}^{-2}$   |
| <hr/>        |            |                                                                                      |                     |
|              | $b$        | bulk phase                                                                           | —                   |
|              | $c$        | thermodynamic critical point                                                         | —                   |
|              | $CF$       | compressed film model                                                                | —                   |
|              | $calc$     | calculated value                                                                     | —                   |
|              | $crit$     | CCN critical activation property                                                     | —                   |
|              | $dry$      | particle under dry conditions (water-free condensed phase, $\text{RH} < 1\%$ )       | —                   |
|              | $guess$    | initial guess                                                                        | —                   |
| Superscripts | $i$        | chemical component or species index                                                  | —                   |
| and          | $max$      | maximum                                                                              | —                   |
| Subscripts   | $min$      | minimum                                                                              | —                   |
|              | $np$       | non-partitioning case                                                                | —                   |
|              | $pm$       | particle phase                                                                       | —                   |
|              | $SL$       | Szyszkowski–Langmuir                                                                 | —                   |
|              | $s$        | surface phase                                                                        | —                   |
|              | $rg$       | range                                                                                | —                   |
|              | $tot$      | total                                                                                | —                   |
|              | $w$        | water                                                                                | —                   |
|              | $wet$      | particle under wet conditions (water present in condensed phase, $\text{RH} > 1\%$ ) | —                   |
|              | $\alpha$   | inorganics-rich phase                                                                | —                   |
|              | $\beta$    | organics-rich phase                                                                  | —                   |
|              | $\phi$     | phase index                                                                          | —                   |
|              | $\star$    | unnormalized                                                                         | —                   |
|              | $\circ$    | standard or reference state                                                          | —                   |

---

## References

- Booth, A. M., Topping, D. O., McFiggans, G., and Percival, C. J.: Surface tension of mixed inorganic and dicarboxylic acid aqueous solutions at 298.15 K and their importance for cloud activation predictions, *Phys. Chem. Chem. Phys.*, 11, 8021–8028, <https://doi.org/10.1039/B906849J>, 2009.
- 5 Ernst, R. C., Watkins, C. H., and Ruwe, H.: The Physical Properties of the Ternary System Ethyl Alcohol–Glycerin–Water., *The Journal of Physical Chemistry*, 40, 627–635, 1935.
- Gervasi, N. R., Topping, D. O., and Zuend, A.: A predictive group-contribution model for the viscosity of aqueous organic aerosol, *Atmospheric Chemistry and Physics*, 20, 2987–3008, <https://doi.org/10.5194/acp-20-2987-2020>, 2020.
- Hyvärinen, A.-P., Lihavainen, H., Gaman, A., Vairila, L., Ojala, H., Kulmala, M., and Viisanen, Y.: Surface Tensions and Densities of Oxalic, Malonic, Succinic, Maleic, Malic, and cis-Pinonic Acids, *Journal of Chemical & Engineering Data*, 51, 255–260, <https://doi.org/10.1021/je050366x>, 2006.
- 10 Jenkin, M. E., Saunders, S. M., and Pilling, M. J.: The tropospheric degradation of volatile organic compounds: a protocol for mechanism development, *Atmospheric Environment*, 31, 81–104, [https://doi.org/10.1016/S1352-2310\(96\)00105-7](https://doi.org/10.1016/S1352-2310(96)00105-7), 1997.
- Jenkin, M. E., Wyche, K. P., Evans, C. J., Carr, T., Monks, P. S., Alfarra, M. R., Barley, M. H., McFiggans, G. B., Young, J. C., and Rickard, A. R.: Development and chamber evaluation of the MCM v3.2 degradation scheme for  $\beta$ -caryophyllene, *Atmospheric Chemistry and Physics*, 12, 5275–5308, <https://doi.org/10.5194/acp-12-5275-2012>, 2012.
- 15 Jenkin, M. E., Young, J. C., and Rickard, A. R.: The MCM v3.3.1 degradation scheme for isoprene, *Atmospheric Chemistry and Physics*, 15, 11 433–11 459, <https://doi.org/10.5194/acp-15-11433-2015>, 2015.
- Rastak, N., Pajunoja, A., Acosta Navarro, J. C., Ma, J., Song, M., Partridge, D. G., Kirkevåg, A., Leong, Y., Hu, W. W., Taylor, N. F., Lambe, A., Cerully, K., Bougiatioti, A., Liu, P., Krejci, R., Petäjä, T., Percival, C., Davidovits, P., Worsnop, D. R., Ekman, A. M. L., Nenes, A., Martin, S., Jimenez, J. L., Collins, D. R., Topping, D., Bertram, A. K., Zuend, A., Virtanen, A., and Riipinen, I.: Microphysical explanation of the RH-dependent water affinity of biogenic organic aerosol and its importance for climate, *Geophysical Research Letters*, 44, 5167–5177, <https://doi.org/10.1002/2017GL073056>, 2017.
- 20 Ruehl, C. R., Davies, J. F., and Wilson, K. R.: An interfacial mechanism for cloud droplet formation on organic aerosols, *Science*, 351, 1447–1450, <https://doi.org/10.1126/science.aad4889>, 2016.
- 25 Wexler, A. S. and Dutcher, C. S.: Statistical Mechanics of Multilayer Sorption: Surface Tension, *The Journal of Physical Chemistry Letters*, 4, 1723–1726, <https://doi.org/10.1021/jz400725p>, PMID: 26282984, 2013.
